# Supplementary material for: A Severity Comparison between Italian and Israeli Rett Syndrome Cohorts
Source: MDPI journal article supplement (doi:10.3390/diagnostics13213390), 2023-11-06
Supplement: s1 [file s1]

|                                       |        |        |       |       |       |       |       |       |       |       |       |       |       |       |       |       |       |       |       |       |       |       |       |       |       |       |       |       |       |       |       |       |       |       |       |       |       |       |       |       |       |
|---------------------------------------|--------|--------|-------|-------|-------|-------|-------|-------|-------|-------|-------|-------|-------|-------|-------|-------|-------|-------|-------|-------|-------|-------|-------|-------|-------|-------|-------|-------|-------|-------|-------|-------|-------|-------|-------|-------|-------|-------|-------|-------|-------|
| Use All<br>[62] vs. no. 100           | Mean   | 19.35  | 2.52  | 2.31  | 2.47  | 1.47  | 1.97  | 2.82  | 2.19  | 2.11  | 1.68  | 2.62  | 2.58  | 2.66  | 2.54  | 1.95  | 2.05  | 3.21  | 3.56  | 3.95  | 2.21  | 1.73  | 1.88  | 1.66  | 1.69  | 1.34  | 2.02  | 1.44  | 1.84  | 2.09  | 2.26  | 1.50  | 3.10  | 15.36 | 3.80  | 10.40 | 7.90  | 10.73 | 7.53  | 10.21 | 48.45 |
|                                       | SD     | 6.11   | 0.90  | 1.16  | 1.07  | 0.64  | 0.63  | 1.07  | 1.10  | 0.98  | 0.80  | 1.14  | 1.11  | 0.97  | 0.99  | 0.71  | 0.92  | 1.03  | 0.85  | 0.25  | 0.44  | 0.46  | 0.08  | 0.74  | 0.52  | 0.37  | 0.92  | 0.44  | 0.52  | 0.95  | 0.86  | 0.65  | 0.53  | 4.00  | 1.32  | 3.23  | 2.00  | 1.84  | 2.45  | 2.41  | 12.85 |
|                                       | Median | 18.00  | 2.50  | 2.00  | 2.00  | 1.00  | 1.50  | 3.00  | 2.00  | 2.00  | 1.50  | 1.00  | 2.50  | 2.50  | 2.50  | 1.50  | 2.00  | 4.00  | 4.00  | 4.00  | 2.00  | 1.50  | 2.00  | 1.50  | 1.50  | 1.00  | 2.00  | 1.00  | 1.50  | 2.00  | 2.00  | 1.50  | 3.00  | 15.00 | 4.00  | 10.50 | 7.00  | 11.50 | 7.50  | 10.00 | 46.50 |
|                                       | Min    | 50.00  | 4.00  | 4.00  | 4.00  | 2.50  | 1.50  | 4.00  | 4.00  | 4.00  | 4.00  | 4.00  | 4.00  | 4.00  | 3.50  | 4.00  | 4.00  | 4.00  | 4.00  | 4.00  | 4.00  | 4.00  | 4.00  | 4.00  | 4.00  | 4.00  | 4.00  | 3.50  | 4.00  | 4.00  | 4.00  | 4.00  | 4.00  | 25.50 | 6.00  | 10.00 | 12.00 | 15.00 | 10.00 | 10.50 |       |
|                                       | Max    | 100.00 | 12.00 | 10.00 | 10.00 | 4.00  | 6.00  | 10.00 | 10.00 | 10.00 | 10.00 | 10.00 | 10.00 | 10.00 | 10.00 | 10.00 | 10.00 | 10.00 | 10.00 | 10.00 | 10.00 | 10.00 | 10.00 | 10.00 | 10.00 | 10.00 | 10.00 | 10.00 | 10.00 | 10.00 | 10.00 | 10.00 | 10.00 | 10.00 | 10.00 | 10.00 | 10.00 | 10.00 | 10.00 | 10.00 | 10.00 |
| Mann-Whitney U Test - CH All vs. CH A |        | 0.000  | 0.710 | 0.117 | 0.730 | 0.130 | 0.996 | 0.002 | 0.962 | 0.819 | 0.105 | 0.009 | 0.044 | 0.001 | 0.000 | 0.809 | 0.300 | 0.129 | 0.004 | 0.400 | 0.920 | 0.002 | 0.710 | 0.950 | 0.392 | 0.402 | 0.001 | 0.111 | 0.001 | 0.961 | 0.902 | 0.844 | 0.325 | 0.420 | 0.002 | 0.379 | 0.542 | 0.002 | 0.333 | 0.100 | 0.506 |
